# Supplementary material for: Pre-Clinical Evaluation of Tenofovir and Tenofovir Alafenamide for HIV-1 Pre-Exposure Prophylaxis in Foreskin Tissue
Source: MDPI journal article supplement (doi:10.3390/pharmaceutics14061285), 2022-06-16
Supplement: s1 [file s1]

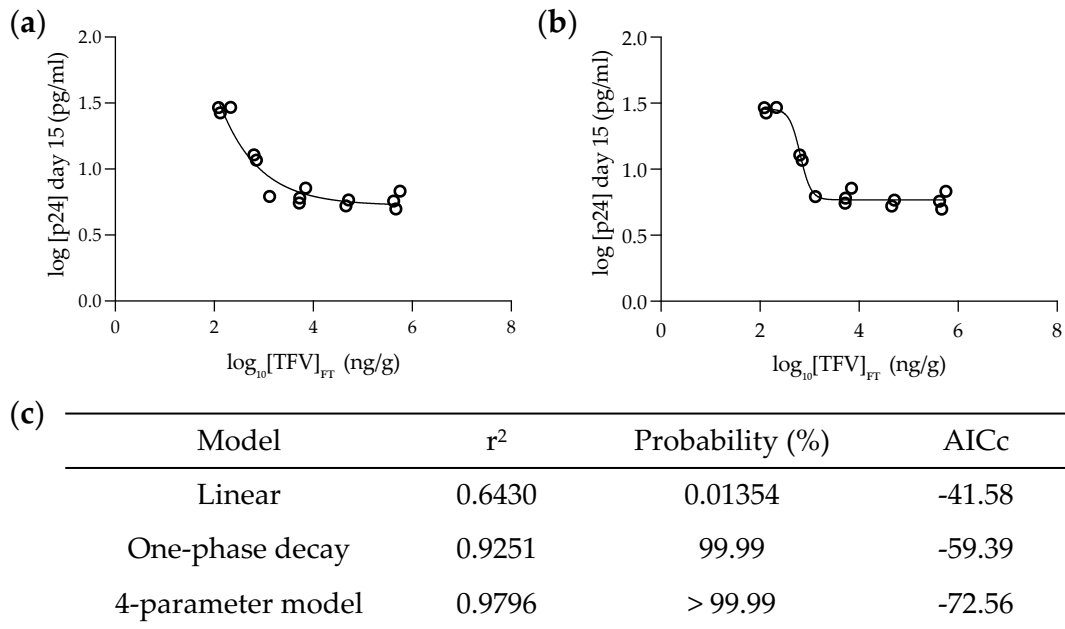

**Figure S1.** Non-linear model of TFV dose and p24 response correlation. (a) Exponential decay fit and (b) 4-parameter non-linear model for tissue explant concentrations of TFV and p24 levels in culture supernatant 15 days post-ex vivo challenge with LVT (O). Data are mean (SEM) from three independent experiments performed in triplicates. FT, foreskin tissue. (c) Comparison of linear with non-linear models.  $r^2$  = (1 - the sum of the squared distances from each fitted curved divided by the squared distances from a horizontal line). AIC = Akaike information criterion value. The 4-parameter non-linear model provided lower AIC values indicating a better fit than an alternative one-phase decay model. One-phase decay model:  $Y = (Y_0 - \text{Plateau}) \cdot \exp(-K \cdot X) + \text{Plateau}$ . Sigmoidal 4-parameter model:  $Y = \text{Bottom} + (\text{Top} - \text{Bottom}) / (1 + 10^{((\text{LogEC50} - X) \cdot \text{HillSlope}))}$ .
