# Supplementary material for: Pre-Clinical Evaluation of Tenofovir and Tenofovir Alafenamide for HIV-1 Pre-Exposure Prophylaxis in Foreskin Tissue
Source: MDPI journal article supplement (doi:10.3390/pharmaceutics14061285), 2022-06-16
Supplement: s1 [file s1]

**Table S2.** Tenofovir-DP concentrations after *ex vivo* dosing of foreskin explants with tenofovir alafenamide (TAF) and tenofovir (TFV).

| Drug       | Dose<br>(µg/mL) | TFV-DP                       |        |                                 |        |                            |        |                                  |        |               |        |
|------------|-----------------|------------------------------|--------|---------------------------------|--------|----------------------------|--------|----------------------------------|--------|---------------|--------|
|            |                 | Foreskin tissue <sup>a</sup> |        | Dosing supernatant <sup>b</sup> |        | Wash Solution <sup>c</sup> |        | Culture Supernatant <sup>b</sup> |        | Total         |        |
|            |                 | pmol/gram                    | % <LLQ | pmol/mL                         | % Loss | pmol/mL                    | % Loss | pmol/mL                          | % Loss | pmol/mL       | % Loss |
| <b>TFV</b> | 5000            | 1,917 (1,088.6) <sup>d</sup> | 0      | 82.9 (52.0)                     | 4.32   | 214.0 (185.6)              | 11.2   | 234.4 (52.7)                     | 12.2   | 531.3 (290.3) | 27.7   |
|            | 500             | 1,307 (236.8)                | 0      | 24.1 (11.4)                     | 1.84   | 21.2 (3.5)                 | 1.62   | 17.9 (1.3)                       | 1.37   | 63.1 (16.3)   | 4.83   |
|            | 50              | 120.3 (51.5)                 | 0      | 4.34 (0.96)                     | 3.60   | 2.62 (0.33)                | 2.17   | 7.11 (0.0)                       | 5.91   | 7.9 (3.9)     | 11.7   |
|            | 5               | 40.7 (21.5)                  | 67     | <LLD                            | N/M    | 1.73 (0.95)                | 4.26   | <LLD                             | N/M    | 1.7 (0.9)     | 4.26   |
|            | 0.5             | 10.8 (3.7)                   | 100    | <LLD                            | N/M    | 1.43 (0.65)                | 13.2   | <LLD                             | N/M    | 1.4 (0.6)     | 13.2   |
| <b>TAF</b> | 15              | 675.0 (184.1)                | 0      | 15.3 (0.0)                      | 2.26   | 7.66 (1.3)                 | 1.13   | 14.5 (0.0)                       | 2.14   | 17.6 (8.6)    | 5.54   |
|            | 1.5             | 111.0 (27.8)                 | 17     | <LLD                            | N/M    | 2.10 (0.0)                 | 1.89   | <LLD                             | N/M    | 2.1 (0.0)     | 1.89   |
|            | 0.15            | 57.0 (7.3)                   | 67     | <LLD                            | N/M    | <LLD                       | N/M    | <LLD                             | N/M    | N/M           | N/M    |
|            | 0.015           | 16.1 (14.1)                  | 75     | <LLD                            | N/M    | <LLD                       | N/M    | <LLD                             | N/M    | N/M           | N/M    |
|            | 0.0015          | 21.5 (11.7)                  | 83     | <LLD                            | N/M    | <LLD                       | N/M    | <LLD                             | N/M    | N/M           | N/M    |

Data are mean (SEM) of three independent experiments performed in triplicates.

<sup>a</sup> n=2 replicates analysed for each donor per dosing level.

<sup>b</sup> n=1 for each donor per dosing level.

<sup>c</sup> 3 x wash solutions pooled (~1800µL), n=1 per dosing level.

<sup>d</sup> replicates from one donor (TFV dose = 5000 µg/mL) excluded due to significant (>200%) TFV-DP loss in the wash and culture media.

N/M: Not measurable.
