# Supplementary material for: Pre-Clinical Evaluation of Tenofovir and Tenofovir Alafenamide for HIV-1 Pre-Exposure Prophylaxis in Foreskin Tissue
Source: MDPI journal article supplement (doi:10.3390/pharmaceutics14061285), 2022-06-16
Supplement: s1 [file s1]

**Table S1.** Tenofovir concentrations after *ex vivo* dosing of foreskin explants with tenofovir alafenamide (TAF) and tenofovir (TFV).

| Drug | Dose<br>(µg/mL) | TFV                          |        |                            |        |                                  |        |                    |        |
|------|-----------------|------------------------------|--------|----------------------------|--------|----------------------------------|--------|--------------------|--------|
|      |                 | Foreskin tissue <sup>a</sup> |        | Wash Solution <sup>c</sup> |        | Culture Supernatant <sup>b</sup> |        | Total <sup>d</sup> |        |
|      |                 | ng/gram                      | % <LLQ | ng/mL                      | % Loss | ng/mL                            | % Loss | ng/mL              | % Loss |
| TFV  | 5000            | 483,169 (42,391.7)           | 0      | 35,078 (4,160.0)           | 7.26   | 450,164 (63,543.5)               | 93.2   | 485,243 (67,497.8) | 100.4  |
|      | 500             | 48,768 (3,102.0)             | 0      | 3555 (232.5)               | 7.29   | 50,098 (5,040.8)                 | 102.7  | 53,652 (5,179.3)   | 110.0  |
|      | 50              | 5,868 (572.5)                | 0      | 436.0 (70.1)               | 7.43   | 4,866 (326.7)                    | 82.9   | 5,302.7 (390.7)    | 90.4   |
|      | 5               | 885.7 (215.0)                | 0      | 50.9 (2.1)                 | 5.74   | 535.7 (63.7)                     | 60.5   | 586.3 (65.5)       | 66.2   |
|      | 0.5             | 156.3 (29.0)                 | 0      | 9.3 (2.3)                  | 5.93   | 78.0 (19.4)                      | 49.9   | 87.0 (21.7)        | 55.8   |
| TAF  | 15              | 12,453 (2,299.6)             | 0      | 63.6 (8.2)                 | 0.51   | 1,060 (115.9)                    | 8.51   | 1,123 (116.3)      | 9.02   |
|      | 1.5             | 1,267 (275.0)                | 0      | 8.78 (1.0)                 | 0.69   | 183.0 (12.8)                     | 14.4   | 192.0 (13.0)       | 15.1   |
|      | 0.15            | 803.7 (614.2)                | 0      | 1.84 (0.3)                 | 0.23   | 22.7 (10.7)                      | 2.79   | 24.3 (10.7)        | 3.02   |
|      | 0.015           | 63.7 (24.6)                  | 0      | 2.35 (1.1)                 | 3.67   | 25.0 (14.6)                      | 39.0   | 26.7 (14.4)        | 41.4   |
|      | 0.0015          | 68.7 (42.7)                  | 0      | 2.59 (1.8)                 | 3.78   | 16.0 (8.5)                       | 23.5   | 18.3 (10.3)        | 27.2   |

Data are expressed as the mean (SEM).

<sup>a</sup> n=1 replicate analysed for each donor per dosing level.

<sup>b</sup> n=1 for each donor per dosing level.

<sup>c</sup> 3 x wash solutions pooled (~1800µL), n=1 per dosing level.

<sup>d</sup> TFV concentrations in the dosing supernatant (harvested after a 2hr incubation period in the presence of foreskin tissue) were not determined, as concentrations were outside of the assay calibration range.
